# Supplementary material for: Associations Between Salt‐Restriction Spoons and Long‐Term Changes in Urinary Na+/K+ Ratios and Blood Pressure: Findings From a Population‐Based Cohort
Source: PubMed Central journal article supplement — J Am Heart Assoc. 2020 Jul 17;9(14):e014897. doi: 10.1161/JAHA.119.014897 (PMC7660739; doi:10.1161/jaha.119.014897), 2020-07-17
Supplement: JAH3-9-e014897-s001.pdf [file JAH3-9-e014897-s001.pdf]

# **SUPPLEMENTAL MATERIAL**

**Table S1. Effect of salt reduction in different populations within three years.**

|                                        | Na <sup>+</sup> /K <sup>+</sup> ratio (mmol/mmol) |               |                        |      |
|----------------------------------------|---------------------------------------------------|---------------|------------------------|------|
|                                        | At baseline                                       | After 3 years | Changes                |      |
|                                        |                                                   |               | Difference*            | %    |
| <b>Sex</b>                             |                                                   |               |                        |      |
| Men (n=171)                            | 6.86 (3.26)                                       | 4.60 (2.10)   | -2.25 (-2.79 to -1.71) | 21.0 |
| Women (n=168)                          | 6.73 (4.19)                                       | 4.19 (2.13)   | -2.55 (-3.21 to -1.89) | 19.2 |
| <b>Baseline age (years)</b>            |                                                   |               |                        |      |
| 18–29 (n=72)                           | 7.52 (4.43)                                       | 4.72 (1.92)   | -2.81 (-3.85 to -1.77) | 21.8 |
| 30–39 (n=81)                           | 7.35 (3.43)                                       | 4.56 (2.47)   | -2.80 (-3.69 to -1.91) | 26.3 |
| 40–49 (n=64)                           | 6.14 (3.06)                                       | 4.31 (1.85)   | -1.83 (-2.59 to -1.07) | 12.8 |
| 50–59 (n=60)                           | 6.21 (3.87)                                       | 4.40 (2.35)   | -1.82 (-2.96 to -0.68) | 6.8  |
| 60–69 (n=62)                           | 6.52 (3.65)                                       | 3.99 (1.98)   | -2.53 (-3.38 to -1.68) | 30.4 |
| <b>Residence</b>                       |                                                   |               |                        |      |
| Urban (n=124)                          | 6.25 (4.25)                                       | 4.13 (1.99)   | -2.12 (-2.93 to -1.31) | 10.0 |
| Rural (n=215)                          | 7.13 (3.39)                                       | 4.58 (2.21)   | -2.55 (-3.03 to -2.07) | 25.9 |
| <b>Education</b>                       |                                                   |               |                        |      |
| Primary school or lower (n=140)        | 6.99 (4.21)                                       | 4.16 (2.09)   | -2.83 (-3.55 to -2.11) | 26.5 |
| Middle school (n=132)                  | 6.67 (3.29)                                       | 4.68 (2.25)   | -1.99 (-2.58 to -1.40) | 14.8 |
| High school (n=44)                     | 6.73 (3.18)                                       | 4.12 (1.45)   | -2.08 (-3.32 to -0.84) | 15.7 |
| College or higher (n=23)               | 6.62 (3.74)                                       | 4.54 (2.21)   | -2.62 (-4.18 to -1.06) | 20.8 |
| <b>Baseline BMI (kg/m<sup>2</sup>)</b> |                                                   |               |                        |      |
| 16.6–24.9 (n=190)                      | 6.66 (3.49)                                       | 4.38 (2.14)   | -2.28 (-2.81 to -1.75) | 19.3 |
| 25.0–29.9 (n=124)                      | 6.30 (3.47)                                       | 4.39 (2.18)   | -1.91 (-2.58 to -1.24) | 16.8 |
| 30.0–37.3 (n=33)                       | 9.42 (4.95)                                       | 4.68 (2.07)   | -4.74 (-6.51 to -2.97) | 36.0 |

| Baseline BP category |             |             |                        |      |
|----------------------|-------------|-------------|------------------------|------|
| Normal (n=131)       | 6.26 (2.89) | 4.49 (2.27) | -1.77 (-2.37 to -1.17) | 14.8 |
| High normal (n=136)  | 6.75 (4.09) | 4.38 (2.11) | -2.37 (-3.08 to -1.66) | 18.7 |
| Hypertension (n=72)  | 7.91 (4.21) | 4.33 (1.97) | -3.58 (-4.54 to -2.62) | 32.3 |
| Total (N=339)        | 6.81 (3.74) | 4.41 (2.14) | -2.39 (-2.61 to -2.17) | 20.1 |

BMI indicates body mass index; BP, blood pressure. Data are means (standard deviations) unless difference indicated by means with 95% confidence intervals. \*All  $P$ s < 0.01 for self-comparisons in each subgroup within three years. %: difference divided by baseline value in each person.
